# Supplementary material
Source: PubMed Central journal article supplement (PMC7397099)
Supplement: supp_AC120.013449_159488_2_supp_551614_qc6lbb.pdf [file supp_AC120.013449_159488_2_supp_551614_qc6lbb.pdf]

| <b>Oligonucleotide Description</b>      | <b>Sequence</b>                                                                                          |
|-----------------------------------------|----------------------------------------------------------------------------------------------------------|
| SARS-CoV2 -1 PRF WT Fwd                 | 5'CTGATGTTCGTaTACAGGGCTTTTG3'                                                                            |
| SARS-CoV2 -1 PRF WT Rev                 | 5'TACTAGTGCCTGTGCCGC3'                                                                                   |
| SARS-CoV -1 PRF Attenuator hairpin Fwd  | 5'gtctgcggatgcatcaacGTTTTTAAACGGGTTTGCGGTGT AAGTGCAG3'                                                   |
| SARS-CoV -1 PRF Attenuator hairpin Rev  | 5'tgcatcaagggttcgcggGTCGACGAGGGCCCCGGGG3'                                                                |
| SARS-CoV2 -1 PRF Attenuator hairpin Fwd | 5'gtcagctgatgcacaatcGTTTTTAAACGGGTTTGCGGTGT AAGTGCAG3'                                                   |
| SARS-CoV2 -1 PRF Attenuator hairpin Rev | 5' tgaagcatgggttcgcggGTCGACGAGGGCCCCGGGG 3'                                                              |
| SARS-CoV -1 PRF Attenuator mutant Fwd   | 5'ccgacgttctaCGTTTTTAAACGGGTTTGCGGTGTAA G3'                                                              |
| SARS-CoV -1 PRF Attenuator mutant Rev   | 5'ctgattgcattaaGGGTTCGCGGGTTCGACGA3'                                                                     |
| SARS-CoV2 -1 PRF Attenuator mutant Fwd  | 5'ccgacgccagtCGTTTTTAAACGGGTTTGCGGTGTAA G3'                                                              |
| SARS-Cov2 -1 PRF Attenuator mutant Rev  | 5'ccgattggagtatGGGTTCGCGGGTTCGACGA3'                                                                     |
| SARS-CoV -1 PRF Stem 1 mutant Fwd       | 5'cccgttttgcacgaGCGGCACAGGCACTAGTA3'                                                                     |
| SARS-CoV -1 PRF Stem 1 mutant Rev       | 5'ctgcacctagactgcAAACCCGTTTAAAAACGTTGATGC 3'                                                             |
| SARS-CoV2 -1 PRF Stem 1 mutant Fwd      | 5'cccgttttgcacgaGCGGCACAGGCACTAGTA3'                                                                     |
| SARS-CoV2 -1 PRF Stem 1 mutant Rev      | 5'ctgcacctagactgcAAACCCGTTTAAAAACGATTGTGC 3'                                                             |
| SARS-CoV -1 PRF Stem 3 mutant Fwd       | 5'agtactgatgtcttCTACAGGGCTTTTGATGGATC3'                                                                  |
| SARS-CoV -1 PRF Stem 3 mutant Rev       | 5'agtgttgggcggcACGGTGTAAGACGGGCTG3'                                                                      |
| SARS-CoV2 -1 PRF Stem 3 mutant Fwd      | 5'agtactgatgtcttATACAGGGCTTTTGATGGATCC3'                                                                 |
| SARS-CoV2 -1 PRF Stem 3 mutant Rev      | 5'agtgttgggcggcACGGTGTAAGACGGGCTG3'                                                                      |
| SARS-CoV -1 PRF Stem 2 mutant Top       | 5'tcgacgTTTTTAAACGGGTTTGCGGTGTAAGTGCAa CCaGTCTTACACCGTGCGGCACAGGCACTAGTACT GATGTCGTCTACAGGaCTTTTGATg 3'  |
| SARS-CoV -1 PRF Stem 2 mutant Bottom    | 5'gatccATCAAAAAGtCCTGTAGACGACATCAGTACTA GTGCCTGTGCCGCACGGTGTAAGAcTGGtTGCACTT ACACCGCAAACCCGTTTAAAAAcg 3' |
| SARS-CoV2 -1 PRF Stem 2 mutant Top      | 5'tcgacgTTTTTAAACGGGTTTGCGGTGTAAGTGCAa CCaGTCTTACACCGTGCGGCACAGGCACTAGTACT GATGTCGTATAACAGGaCTTTTGATg 3' |
| SARS-CoV2 -1 PRF Stem 2 mutant Bottom   | 5'gatccATCAAAAAGtCCTGTATACGACATCAGTACTA GTGCCTGTGCCGCACGGTGTAAGAcTGGtTGCACTT ACACCGCAAACCCGTTTAAAAAcg 3' |

|                      |                                                                                                                |
|----------------------|----------------------------------------------------------------------------------------------------------------|
| SARS-CoV2 -1 PRF FWD | 5'gTTTTTAAACGGGTTTGCGGTGTAAGTGCAGCCC<br>GTCTTACACCGTGCGGCACAGGCACTAGTACTGAT<br>GTCGTATACAGGGCTTTa 3'           |
| SARS-CoV2 -1 PRF REV | 5'ctagtAAAGCCCTGTATACGACATCAGTACTAGTGC<br>CTGTGCCGCACGGTGTAAGACGGGCTGCACTTACA<br>CCGCAAACCCGTTTAAAAActgca 3'   |
| SARS-CoV2 0 PRF FWD  | 5'gTTTAGAAACGGGTTTGCGGTGTAAGTGCAGCC<br>CGTCTTACACCGTGCGGCACAGGCACTAGTACTGA<br>TGTCGTATACAGGGCTTTa 3'           |
| SARS-CoV2 0 PRF REV  | 5'ctagtAAAGCCCTGTATACGACATCAGTACTAGTGC<br>CTGTGCCGCACGGTGTAAGACGGGCTGCACTTACA<br>CCGCAAACCCGTTTCTAAActgca 3'   |
| SARS-CoV2 STOP FWD   | 5'gTTTTGAAACGGGTTTGCGGTGTAAGTGCAGCCC<br>GTCTTACACCGTGCGGCACAGGCACTAGTACTGAT<br>GTCGTATACAGGGCTTTTa 3'          |
| SARS-CoV2 STOP REV   | 5'ctagtAAAAGCCCTGTATACGACATCAGTACTAGT<br>GCCTGTGCCGCACGGTGTAAGACGGGCTGCACTTA<br>CACCGCAAACCCGTTTCAAAAActgca 3' |

**Supplementary Table 1. Synthetic oligonucleotides used in this study.**

| <b>Plasmid</b> | <b>Description</b>                                                                                                  |
|----------------|---------------------------------------------------------------------------------------------------------------------|
| pJD2257        | Modified pSGDluc (dual luciferase with inteins) Readthrough control                                                 |
| pJD2359        | Modified pSGDluc (dual luciferase with inteins) with SARS-CoV -1 PRF insert                                         |
| pJD2514        | Modified pSGDluc (dual luciferase with inteins) with SARS-CoV-2 -1 PRF insert                                       |
| pJD2515        | Modified pSGDluc (dual luciferase with inteins) with SARS-CoV silent slippery site mutant insert                    |
| pJD2516        | Modified pSGDluc (dual luciferase with inteins) with SARS-CoV-2 silent slippery site mutant insert                  |
| pJD2517        | Modified pSGDluc (dual luciferase with inteins) with SARS-CoV attenuator hairpin and -1 PRF insert                  |
| pJD2518        | Modified pSGDluc (dual luciferase with inteins) with SARS-CoV disrupted attenuator hairpin and -1 PRF insert        |
| pJD2519        | Modified pSGDluc (dual luciferase with inteins) with SARS-CoV2 attenuator hairpin and -1 PRF insert                 |
| pJD2520        | Modified pSGDluc (dual luciferase with inteins) with SARS-CoV-2 disrupted attenuator hairpin and -1 PRF insert      |
| pJD2521        | Modified pSGDluc (dual luciferase with inteins) with SARS-CoV -1 PRF insert containing silent mutations in Stem 1   |
| pJD2522        | Modified pSGDluc (dual luciferase with inteins) with SARS-CoV -1 PRF insert containing silent mutations in Stem 2   |
| pJD2523        | Modified pSGDluc (dual luciferase with inteins) with SARS-CoV -1 PRF insert containing silent mutations in Stem 3   |
| pJD2524        | Modified pSGDluc (dual luciferase with inteins) with SARS-CoV-2 -1 PRF insert containing silent mutations in Stem 1 |
| pJD2525        | Modified pSGDluc (dual luciferase with inteins) with SARS-CoV-2 -1 PRF insert containing silent mutations in Stem 2 |
| pJD2526        | Modified pSGDluc (dual luciferase with inteins) with SARS-CoV-2 -1PRF insert containing silent mutations in Stem 3  |
| DTO20          | pISO plasmid modified with insert containing <i>Renilla</i> luciferase and pMLuc1 multiple cloning site             |
| DTO20-1FSWu    | DTO20 with SARS-CoV-2 -1PRF insert                                                                                  |
| DTO20-0FSWu    | DTO with SARS-CoV-2 0 PRF insert                                                                                    |
| DTO20-STOPWu   | DTO with SARS-CoV-2 -1PRF insert modified with stop codon in the slippery sequence                                  |

**Supplementary Table 2. Plasmids used in this study.**
